# Supplementary material for: Combining time-lapse electrical resistivity and self-potential methods to assess soil moisture dynamics in a forested catchment under the rainfall event
Source: Copernicus journal article supplement (doi:10.5194/hess-2023-190), 2023-08-29
Supplement: Supplementary file [file hess-2023-190-RC3-supplement.pdf]

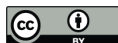

1 **Combining time-lapse electrical resistivity and self-**  
2 **potential methods to assess soil moisture dynamics in a**  
3 **forested catchment under the rainfall event**

4 Wenhang Jiang<sup>1,3</sup>, Aimin Liao<sup>1,2</sup>, Jiufu Liu<sup>1</sup>, Guodong Liu<sup>3</sup>

5 <sup>1</sup>State Key Laboratory of Hydrology-Water Resource and Hydraulic Engineering, Nanjing Hydraulic  
6 Research Institute, Nanjing, PR China;

7 <sup>2</sup>Chuzhou Scientific Hydrology Laboratory, Nanjing Hydraulic Research Institute, Chuzhou, PR China;

8 <sup>3</sup>State Key Laboratory of Hydraulics and Mountain River Engineering, Sichuan University, Chengdu,  
9 PR China

10 *Correspondence to:* Aimin Liao (seamsun1226@163.com)

11 **Abstract.** Infiltration process and soil moisture dynamics in response to rainfall are crucial for subsurface  
12 flow generation, landslide hazard control, and hydro-ecosystem management. Geophysical tools such as  
13 the electrical resistivity tomography (ERT) and self-potential (SP) method have proven useful in  
14 providing greater temporal and spatial subsurface information and making connections to water content  
15 or water flux. In this study, the combination of ERT and SP was used to enhance our understanding of  
16 water infiltration processes caused by natural rainfall, subsurface structures, and plant root distribution.  
17 We installed 100 ERT electrodes with an electrode spacing of 0.5 m on a tree-covered hillslope to  
18 conduct ERT surveys every two weeks from June to October 2022, and increase the frequency of  
19 measurements during rainfall events. Non-polarized electrodes were used to measure SP along the  
20 hillslope and at various depths. Time-domain reflectometry (TDR) sensors were used to obtain the soil  
21 water content as an accurate reference to establish the petrophysical relationship between soil moisture  
22 and resistivity. Based on the robustness assessment of these relationships, the results suggest that the  
23 Dipole-Dipole configuration may help to obtain a more reasonable interpretation of resistivity at the  
24 forest site than the Wenner configuration. The joint interpretation of the SP and ERT results showed that  
25 water flow in the study area is dominated by vertical direction, and two preferential flow paths due to the  
26 fractured and permeable soil layer interface provide important vertical hydrological connections between  
27 deep and shallow soil layers. In addition, the subsurface infiltration processes were strongly influenced  
28 by the trees with different root characteristics. Trees with shallow roots tend to retain more water content  
29 at the surface. Deep-rooted trees absorb and store water in deeper layers, resulting in significant abrupt

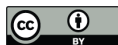

30 changes in the water content of the deeper soil layers. The results of this study provide a basis for  
31 investigating the hydrological connectivity and climate sensitivity of soil water distribution by linking  
32 rainfall with subsurface information provided by the ERT and SP.  
33



34 **1 Introduction**

35 Precipitation is the most direct and significant source of soil water recharge. Characterizing the effects  
36 of precipitation on the infiltration process and soil moisture is critical for the prediction of hydrological  
37 pathways (Tetzlaff et al., 2014; Zeng et al., 2016; Hermans et al., 2023), landslide hazard control (Hojat  
38 et al., 2019; Nielson et al., 2021; Tsai et al., 2021) and hydro-ecosystem management (Carey et al., 2019).  
39 In addition, subsurface structure, vegetation canopies, and highly distributed roots can be the significant  
40 contributors to the flow, leading to heterogeneity in soil moisture distribution and associated dynamics  
41 (Holbrook et al., 2014; Dick et al., 2018; Vanella et al., 2018). Due to the lack of appropriate tools and  
42 the heterogeneity of soil properties in the subsurface, the water dynamics of fluxes and processes and  
43 their influences remain poorly understood. Several studies have addressed the dynamics of rainfall  
44 infiltration (Cassiani et al., 2009; Travelletti et al., 2012; Carey et al., 2019), moisture variability due to  
45 hydraulic redistribution (Robinson et al., 2012; Ain-Lhout et al., 2016; Dick et al., 2018; Guo et al.,  
46 2020), soil-root interactions (Garré et al., 2011; Amato et al., 2008; Vanella et al., 2018), and the  
47 influence of subsurface structures (Holbrook et al., 2014; Hermans et al., 2023). However, few studies  
48 have simultaneously concerned the above multiple influences during the rainfall infiltration process,  
49 especially the effects of root characteristics between different tree species on water distribution. This is  
50 of great interest in bridging the gap between common modeling approaches and field realities.

51 Soil moisture dynamics in the subsurface are particularly difficult to characterize. These processes  
52 are typically measured using a gravimetric analysis, isotopic tracing, or in situ sensors such as time-  
53 domain reflectometry (TDR). These point data or low sampling density prevented a full description of  
54 the dynamics of hydrological processes and structures with a high spatial resolution (Zhou et al., 2001;  
55 Tetzlaff et al., 2014; Parsekian et al., 2015). Geophysical techniques such as electrical resistivity  
56 tomography (ERT) (Srayeddin and Doussan, 2009; Robinson et al., 2012; Beff et al., 2013; Fan et al.,  
57 2020; Nielson et al., 2021) and self-potential (SP) (Doussan et al., 2002; Suski et al., 2006; Revil et al.,  
58 2012; Voytek et al., 2016, 2019) have been proven to be useful in providing minimally invasive ways to  
59 visualize the hydrogeological processes. Cassiani et al. (2009) and Carey et al. (2019) observed the  
60 evolution of the wetting peak evolution under transient unsaturated conditions with ERT, when rainfall  
61 occurred over a fixed rainfall simulator location (not the entire slope). However, the natural rainfall often



62 occurs over the entire slope, making it difficult to use ERT alone to determine whether the wetting  
63 evolution is dominated by lateral subsurface flow or vertical infiltration flow. The SP method has been  
64 found to be a complementary methods in characterizing subsurface water flow. Richards et al. (2010)  
65 used the ERT and SP and identified nine preferential flow paths in faults. Voytek et al. (2016) identified  
66 the hydrologic flowpaths on arctic hillslopes using ERT and SP and provided greater insight into how  
67 flow paths and the frost boundary interrelate. However, the combination of the two approaches has rarely  
68 been highlighted for investigating the spatial-temporal variation of the subsurface flow in response to  
69 rainfall events in the forested site.

70 In the study of soil moisture dynamics using ERT, some used the Dipole-Dipole configuration on  
71 account of its improved resolution of vertical variations (Zeng et al., 2016; Greer et al., 2017), while  
72 others used the Wenner configuration to account for the horizontal structures (Hojat et al., 2019).  
73 Resistivity results are not unique using different measurements or representation, which is a very  
74 important source of uncertainty in data interpretation (Giudici, 2000; Clément et al., 2014). Some papers  
75 dealt with the depth of investigation (Oldenburg and Li, 1999; Robinson et al., 2012; Carey et al., 2019),  
76 and some with the sensitivity ( Holbrook et al., 2014) of the resistivity image resulting from different  
77 electrode arrays. Ain-Lhout et al. (2016) focused on the ability to recognize resistivity differences in  
78 different media, and concluded that the Wenner configuration seems to be the most appropriate as it can  
79 differentiate the resistivities of the soil, soil moisture, and argan roots. These studies reported different  
80 perspectives to decide electrode arrays for more reliable and representative ERT measurements, and no  
81 similar study evaluated the ERT configuration performance by  $R^2$  of the petrophysical relationship  
82 between resistivity and water content, especially in the forested site.

83 Here, two-dimensional ERT surveys were coupled with the SP method to characterize the  
84 infiltration process in response to rainfall at a resolution of decimeters, at the Nandadish experimental  
85 catchment between the Yangtze River and Huai River of eastern China. We also present observations of  
86 soil structure and root characteristics at 2 m depth to assess the impact of structure on water flow  
87 processes. Meanwhile, TDR sensors are used to obtain the volumetric water content as an accurate  
88 reference to interpret the variation in the electrical resistivity as a function of soil water. The site-specific  
89 resistivity and soil water content (SWC,  $\rho-\theta$ ) relationships were developed based on a variety of ERT



90 measuring configurations. This provided a more detailed description of the subsurface hydrologic  
91 response through quantitative comparison. And, unlike the single configuration such as Wenner or  
92 Dipole-Dipole that is commonly used, we used both configurations and compared them through the  $R^2$   
93 of the  $\rho$ - $\theta$  relationship to obtain the most appropriate measurement configuration for the soil moisture  
94 dynamics in response to rainfall at the study site.

95 The objectives of this study were (a) to investigate the potential of a combination of time-lapse ERT  
96 and SP for detecting the spatial-temporal variability of soil moisture dynamics in response to the rainfall  
97 at the forest field scale. (b) to evaluate the influence of different measuring configuration on the  
98 interpretation of resistivity data results, and quantify and visualize subsurface hydrological processes  
99 based on the established petrophysical relationship between resistivity and water content, using a spatial  
100 ERT and a conventional TDR method. (c) to evaluate the influence of vegetation root systems and  
101 subsurface structure on spatial soil moisture patterns and dynamics during the rainfall event by coupling  
102 structure and process descriptions. The datasets generated in this paper provide quantitative information  
103 on soil moisture dynamics in temporal and spatial dimensions that can improve the understanding of  
104 subsurface flow movements during rainfall in the forest field.

## 105 **2 Methods**

### 106 **2.1 Study area**

107 The study area, the Nandadish catchment with an area of 7897 m<sup>2</sup>, was an experimental catchment  
108 belonging to the Chuzhou Scientific Hydrology Laboratory of the Nanjing Hydraulic Research Institute  
109 (118°12'37" E, 32°17'24" N). The Nandadish catchment is located at a typical climate transition zone  
110 (between the Yangtze River and Huai River Basin) from subtropical to the warm temperate of eastern  
111 China (Figure 1), with an average annual rainfall (from 1951 to 2016) of 1008 mm. Rainfall is strongly  
112 seasonal, with more than 80% of the total rainfall occurring from May to October.

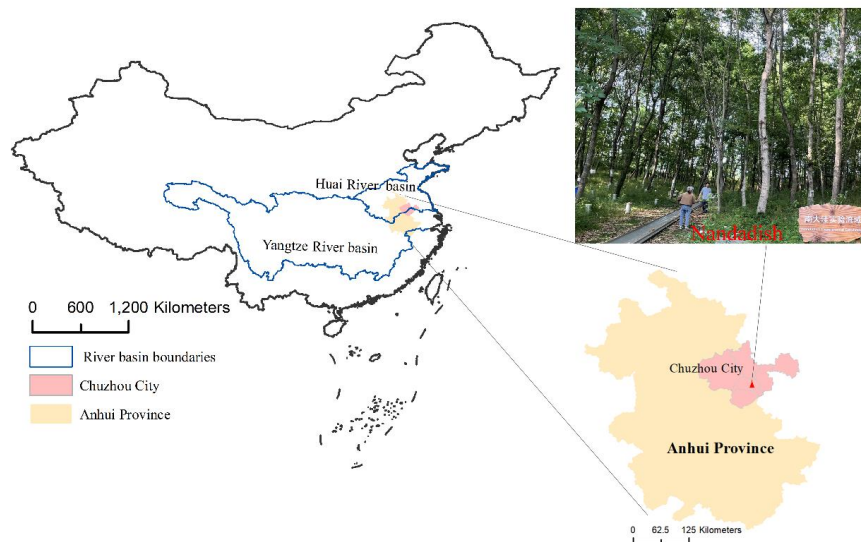

113  
 114 **Figure 1: Location of the Nandadish site in the climate transition zone from subtropical to warm temperate,**  
 115 **eastern China.**

116 The upper part of the Nandadish is forested with a stand density of 1128 trees/ha; the substrate is  
 117 Mesozoic andesite; the middle part is a loose Quaternary deposit varying from 0.5 to 7.0 m. **Its perimeter**  
 118 **is separated from the surrounding area by concrete boundary walls and acts as a watershed,** making the  
 119 Nandadish available as a forested critical zone experimental body suitable for hydrological research (Gu  
 120 et al., 2018). As a typical area of deciduous broadleaved forest, the vegetation in the Nandadish is  
 121 dominated by *Quercus acutissima* Carruth. and *Broussonetia papyrifera*, which account for 67.4% and  
 122 21.5% of the basal area, respectively.

123 **Table 1: The Nandadish soil texture in the different locations and depths.**

| Pits Location | Depth (cm) | Clay % <2 μm | Silt % 2 to 50 μm | Sand % 50 to 2000 μm |
|---------------|------------|--------------|-------------------|----------------------|
| Toe           | 5          | 11.00        | 82.74             | 6.26                 |
|               | 15         | 11.62        | 82.95             | 5.43                 |
|               | 25         | 11.96        | 83.02             | 5.02                 |
|               | 35         | 12.22        | 82.74             | 5.04                 |
|               | 55         | 13.32        | 80.87             | 5.81                 |
|               | 75         | 12.81        | 80.45             | 6.75                 |
| Middle        | 105        | 14.32        | 79.65             | 6.03                 |
|               | 5          | 13.16        | 58.64             | 28.20                |



|     |     |       |       |       |
|-----|-----|-------|-------|-------|
|     | 15  | 9.50  | 47.27 | 43.24 |
|     | 5   | 12.63 | 82.31 | 5.06  |
|     | 15  | 11.43 | 84.01 | 4.56  |
|     | 25  | 12.65 | 83.07 | 4.29  |
| Top | 35  | 12.15 | 83.89 | 3.97  |
|     | 55  | 12.20 | 83.75 | 4.06  |
|     | 75  | 12.41 | 83.29 | 4.30  |
|     | 105 | 12.56 | 83.03 | 4.41  |

124 Soil properties analyses were conducted on samples collected from the top, middle, and the toe  
 125 exploring pits (distributed at 7 m, 25 m and 45 m from the toe of the slope to the top) of a two-dimensional  
 126 section in the Nandadish (Figure 2), at seven depths of 5, 15, 25, 35, 55, 75, and 105 cm. Three textural  
 127 fractions, clay (0 to 2  $\mu\text{m}$ ), silt (2 to 50  $\mu\text{m}$ ), and sand (50 to 2000  $\mu\text{m}$ ), were used according to the United  
 128 States Department of Agriculture (USDA) standards (Cassiani et al., 2015). The soil was uniform in the  
 129 upper 1.05 m, consisting of a silt loam texture (Table 1), and the mean organic carbon was 10.31 g/kg.

130 The northwest hydrographic slope of the Nandadish crossed a transect of tree roots and open ground  
 131 (Figure 2). The two-dimensional ERT system, SP electrodes, and the exploring pits were installed on the  
 132 slope. Three exploring pits were excavated to facilitate the TDR installation and soil sampling. The two-  
 133 dimensional ERT system we installed consists of 100 stainless steel electrodes, 39 cm in length and 1  
 134 cm in diameter, inserted in the ground at a depth of 15 cm and spaced at a 0.5 m horizontal intervals  
 135 along the slope (Figure 2). The total length of the surface ERT line was 49.5 m. The relative elevation of  
 136 each electrode point was measured using a gradiometer and incorporated into the inversion processes.  
 137 SP measurements in this paper were performed along the section that were nearly parallel to the 2-D  
 138 ERT section, using Pb-PbCl<sub>2</sub> non-polarizing electrodes (developed by China University of Mining and  
 139 Technology, Wang et al., 2022). The distance between the SP electrodes was 2 m, and the total length of  
 140 the SP line was 38 m. SP electrodes along the slope were installed out at a depth of approximately 15  
 141 cm. Meanwhile, we also placed SP electrodes at depths of 5, 15, 25, 35, 55, 75, and 105 cm in the pit  
 142 position, focusing on monitoring the infiltration processes. On this slope, the obvious surface roots were  
 143 distributed at 25 to 26 (about 12 m) and 67 to 69 (about 33 m) ERT electrodes from the toe of the slope  
 144 to the top.

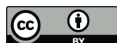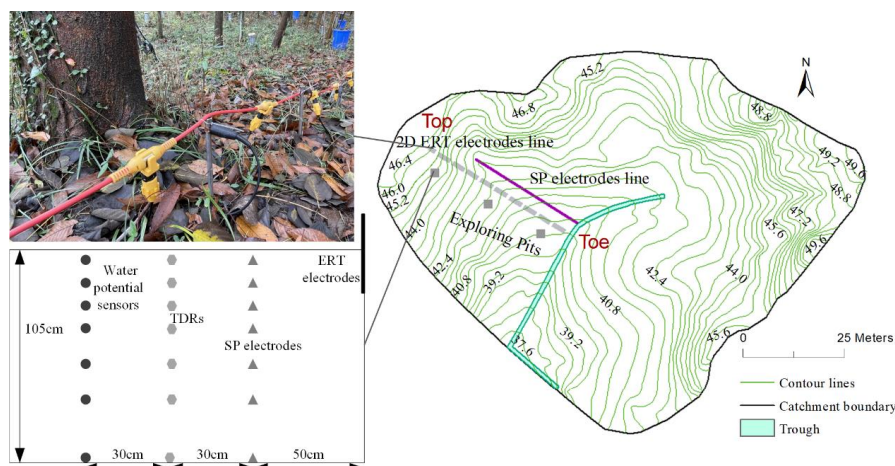

145

146 **Figure 2: Experimental setup of the slope at the Nandadish site, including the location of ERT electrodes, SP**  
147 **electrodes, TDRs and water potential sensors.**

## 148 2.2 Electrical resistivity tomography

### 149 2.2.1 Data acquisition and processing

150 The repeated (so called time-lapse) ERT surveys were carried out with the above-mentioned equipment  
151 every two weeks from June to October 2022. The measurements were intensified during rainy periods to  
152 better represent the rainfall infiltration processes in the subsurface. ERT data were collected using a GD-  
153 20 instrument (ST Geomatic Co., Ltd, China), which is a multi-channel system for performing ERT, SP  
154 and Induced Polarization (IP) measurements. Meanwhile, the GD-20 was equipped with real-time online  
155 field monitoring mode to conduct unattended and automated surveys remotely for long periods.

156 In this work, two different four-pole configurations, Wenner and Dipole-Dipole array, were used  
157 for the acquisition of apparent electrical resistivity. Prior each measurement, a contact resistance test  
158 between the electrode and the soil was performed to verify the correct operation of the GD-20 monitoring  
159 system (Luongo et al., 2012; Zeng et al., 2016). Meanwhile, to avoid anomalies in the resistance  
160 measurements during drought caused by poor contact (dry soils can produce a vacuum at the soil-root  
161 interface), a little water was added to slightly wet the soil around the electrodes. Each measurement  
162 included 1370 measurement points for the Wenner and 1702 points for the Dipole-Dipole, and took  
163 approximately 40 minutes and 45 minutes, respectively.





164 While it was not possible to collect reciprocals (current electrodes and potential electrodes are  
165 swapped) to determine the fast flow process (Guo et al., 2020), all ERT surveys included only the  
166 acquisition data of the direct measurement. After the surveys, all the apparent resistivity data from the  
167 ERT measurements were preprocessed to remove noisy data with anomalously high contact resistance  
168 ( $>5000 \Omega$ ) (Fan et al., 2020; Vanella et al., 2018).

169 The different soil temperature between deep soil layers of 105 cm and surface soil layers of 5 cm is  
170 0 to 15.3°C during the study period. Each pixel of the above filtered apparent electrical resistivity was  
171 corrected for the effect of temperature referenced to 18°C using the following relationship (Amato et al.,  
172 2008; Srayeddin and Doussan, 2009).

$$173 \rho_T = \rho_{T_0} [1 + \lambda(T_0 - T)] \quad (1)$$

174 where  $\rho_T$  is electrical resistivity ( $\Omega$  m) at the temperature  $T$  (°C);  $\rho_{T_0}$  is electrical resistivity ( $\Omega$  m) at  
175 the temperature  $T_0$  (°C),  $T_0 = 18^\circ\text{C}$ .  $\lambda$  is the temperature correction coefficient,  $\lambda = 0.02$ .

### 176 2.2.2 Data inversion

177 The **true** spatial distribution of resistivity can be determined by inversion of the subsurface apparent  
178 resistivity within a specified error level and appropriate inversion model constraints (Travelletti et al.,  
179 2012; Consoli et al., 2017). To process the time-lapse resistivity data, we used the 2D inversion software  
180 EarthImager, developed by Advanced Geosciences Inc., United States. The underdetermined and ill-  
181 posed nature of 2D resistivity inverse problems makes the inverse solution inherently nonunique.  
182 Additional constraints, or regularization, must be imposed on the model to extract an optimal solution.  
183 In this paper, the inversion is performed using a weighted least-squares approach with smoothness  
184 constraint (deGroot-Hedlin et al., 1990; Nimmer et al., 2007; AGI 2009). The resistivity distribution is  
185 solved by minimizing the objective function as seen below.

$$186 \Phi(\mathbf{m}) = [\mathbf{d} - f(\mathbf{m})]^T \mathbf{W}_d [\mathbf{d} - f(\mathbf{m})] + \alpha \mathbf{m}^T \mathbf{R} \mathbf{m} \quad (2)$$

187 where  $\mathbf{m}$  is the model vector of resistivities,  $\mathbf{m} = \log_e(\rho^{-1})$ ;  $\mathbf{d}$  is the vector of measured resistance data;  
188  $f(\mathbf{m})$  is the forward model resistances (the forward operator);  **$T$  is the matrix transfer**;  $\mathbf{W}_d$  is an error  
189 weighting matrix, i.e., measurement errors, quantified here using a certain percentage of noise as the data



190 weight of 3%.  $\alpha$  is a Lagrange multiplier and a stabilizing factor. It determines the amount of model  
191 roughness imposed on the model during the inversion.  $\mathbf{R}$  is a roughness operator used to smooth the  
192 resistivity distribution and stabilize the inverse solution. The root mean square (RMS) in each survey  
193 was calculated to find a resistivity model whose response best fits the measured data (Tsai et al., 2021).  
194 An iterative solution is reached when the RMS error in percent is less than 5%.

195 The effect of soil characteristics, such as clay content, on the measured electrical resistivity should  
196 be minimized by accounting for differences in resistivity (Srayeddin and Doussan, 2009). To better  
197 identify the changes of wetting peaks due to rainfall, we need to select the base (pre-rainfall) resistivity  
198 dataset, which can be regarded as an a-priori resistivity model. The time-lapse inversion method was  
199 used to invert the difference between the monitor and base datasets. Instead of inverting the monitor  
200 dataset alone, the coherent inversion artifacts caused by numerical inaccuracies can be eliminated in the  
201 images. The result of the time-lapse inversion is presented as the percent change in resistivity between  
202 the two resistivity distribution. The resistivity change was calculated as the relative resistivity difference  
203 ( $\Delta\rho$ , %) (Luongo et al., 2012; Clément et al., 2014) between the monitor ( $\rho_i$ ,  $\Omega$  m) and the base data  
204 resistivity ( $\rho_0$ ,  $\Omega$  m). An increase in resistivity results in a positive percent change and a decrease results  
205 in a negative percent change.

$$206 \quad \Delta\rho = \frac{\rho_i - \rho_0}{\rho_0} \times 100 \quad (3)$$

### 207 2.3 Self potential

208 SP is a passive geophysical technique that uses a pair of non-polarizing electrodes and a high-impedance  
209 voltmeter to detect voltage differences caused by naturally occurring electrical currents. One source of  
210 electric current is associated with the flow of water in the subsurface through a permeable or porous  
211 material, also called the streaming potential. This current contribution originates from the polar water  
212 molecules moving through charged grain surfaces at the fluid-grain interface (Linde et al., 2011; Voytek  
213 et al., 2016). Therefore, there is a strong interest to obtain information relative to the fluid flow pattern  
214 using a SP method (Sidle et al., 2001; Suski et al., 2006). The depth of investigation for SP is difficult to  
215 determine because it depends on the strength of the current source (Voytek et al., 2016). The principle



216 of SP can be described by the Ohm's law and Maxwell's equations as follows (Richards et al., 2010;  
217 Linde et al., 2011; Voytek et al., 2019).

$$218 \quad j = \sigma E + j_s \quad (4)$$

$$219 \quad \nabla \cdot j = 0 \quad (5)$$

220 where  $j$  is the total current density ( $\text{Am}^{-2}$ );  $\sigma E$  is the conduction current density;  $\sigma$  is the electrical  
221 conductivity ( $\text{Sm}^{-1}$ );  $E$  is the electrical field ( $\text{Vm}^{-1}$ ), and  $E = -\nabla V$ ,  $V$  is the electrical potential between  
222 a reference and a potential electrode from SP method; and  $j_s$  is the source current density ( $\text{Am}^{-2}$ ),  
223 generated by water movement or other possible current sources. These two equations can help obtained  
224 the distribution of  $V$  given knowledge of  $j_s$ .

225 ERT is sensitive to static or state variables such as water content, while SP is sensitive to dynamic  
226 processes such as water flow. For this reason, SP signals can be used to describe the water flow path in  
227 hydrology, and measured SP voltages should increase in the direction of flow (Voytek et al., 2019).  
228 Rather than one dimensional flow in horizontal (Linde et al., 2011; Voytek et al., 2016) or depth (Doussan  
229 et al., 2002), we used SP to evaluate both the two-dimensional soil water movement in this paper. The  
230 reference electrode was buried at a depth of approximately 60 cm and located 9 m from the center of the  
231 SP section, and the potential difference between the measurement and reference electrodes was recorded  
232 with a data collector (DataTaker 85, Biolab, Inc., Australia) at 1 min intervals.

233 Due to telluric currents and induction effects in the cables, many spikes occur in the time series of  
234 the SP data. The spikes in the time series were removed while maintaining the total amplitude of the SP  
235 variations. The temperature drift of the SP electrodes is very small, 0.01 mV/°C, So the effect of the  
236 offset due to temperature can be ignored (Wang et al., 2022).

#### 237 **2.4 Hydrometric and seismic prospecting**

238 Rainfall data were collected from a cluster of tipping bucket rain gauges with the measurement error  $\leq$   
239  $\pm 4\%$  located at the automatic weather station 300 m away the Nandadish forest from June to October  
240 2022. These rainfall data were collected at 1 minute intervals.

241 The soil water content (SWC) was monitored using a set of TDR probes (TDR315H, Acclima, Inc.,  
242 United States). The probes were installed at the toe, middle and top of the slope where the electrical  
243 resistivity measuring electrodes were placed, horizontally at seven depths of 5, 15, 25, 35, 55, 75, 105



244 cm in the subsurface. In the middle, as the depth of the bedrock from the ground surface is about 15 cm,  
245 only two probes were installed at the depths corresponding to 5 and 15 cm. The soil temperature can also  
246 be obtained from the TDR probes, which was required for the temperature correction of the electrical  
247 resistivity to a standard temperature. Water potentials were monitored at the same depths as the TDR  
248 sensors using Campbell 253 (Campbell 253, Campbell Scientific, Inc., United States). The SWC, soil  
249 temperature, and water potentials for each location were collected using a CR1000X data logger at 10  
250 min intervals. All sensors were left in place for two weeks to ensure good contact with the surrounding  
251 soil.

252 The seismic refraction method was used to create the primary p-wave velocity and obtain the  
253 thickness information of weathering layers and the position of the fractured bedrock. The energy from a  
254 seismic source travels through the soil in the subsurface and is refracted when it reaches the transition of  
255 different material compositions and compaction. The seismic refraction data were recorded between the  
256 ERT and SP section using MCSEIS-SX48 (OYO Corporation, Japan) with 24 channel seismographs and  
257 28 Hz vertical component geophones spaced at 2.0 m. The last geophone of the previous spread (48 m)  
258 became the first geophone of the next spread, this multiple spread allowed 49.5 m spread lengths. The  
259 shot was a 5 kg sledgehammer that struck a stainless-steel circular plate with a diameter of 10 cm and a  
260 thickness of 4 cm. The first arrival times of the P wave were picked manually on all traces. Based on a  
261 2D layered velocity, the inversion was performed until the root-mean-square (RMS) error between the  
262 observed and modeled travel times reached 5 %. The inversion results are smooth boundaries with  
263 different velocity values. The 0.5 km s<sup>-1</sup> contour on all final velocity models was used to delineate the  
264 transition between loose, highly porous media and the underlying saprolite, and the 1.2 km s<sup>-1</sup> contour  
265 represents the transition between the saprolite and fractured bedrock (Holbrook et al., 2014; Carey et al.,  
266 2019).



267 **3 Results**

268 **3.1 Hydrometric observations**

269 Rainfall during the flood season from June to October is shown in Figure 3. The rainfall that occurred on  
270 July 4, 2022 and produced a total rainfall of 133.5 mm within 2.6 hours was selected to analyze the  
271 infiltration behavior before, during, and after the rainfall event.

272 The changes in typical SWC and water potential of the different vertical soil layers were obtained  
273 by averaging of the same layer from pit 1 and pit 3. The SWC remained between 0.18 and 0.45  $\text{cm}^3\text{cm}^{-3}$ ,  
274 while water potential remained between 0 and -488 kPa during the study period. During the period  
275 without rainfall, the soil moisture and water potential measured at different depths decreased steadily.  
276 Peaks of the SWC and water potential generally coincided with rainfall events, with the response  
277 typically attenuated at deeper soil depths. For example, with the rainfall on August 26, 2022, the SWC  
278 and water potential showed an expected increasing tendency in varying degrees only at the near-surface  
279 depths of 5, 15, and 25 cm, while there was no significant response at other depths. In addition, the near-  
280 surface sensors at 5, 15, and 25 cm depths recorded a lower SWC values than those at the greater depths  
281 throughout the flood season, as the top soils dried out due to root water uptake and soil evaporation in  
282 forested areas.

283

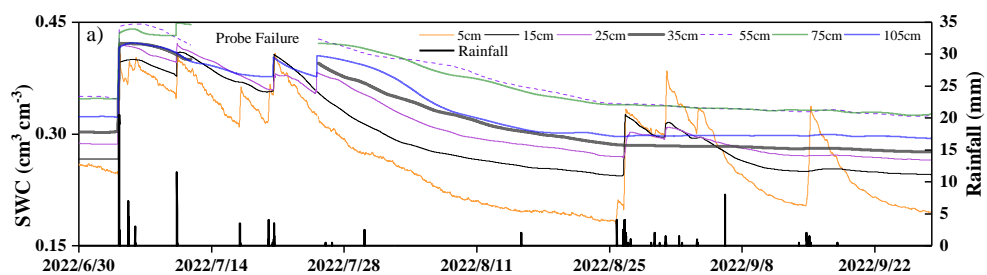

284

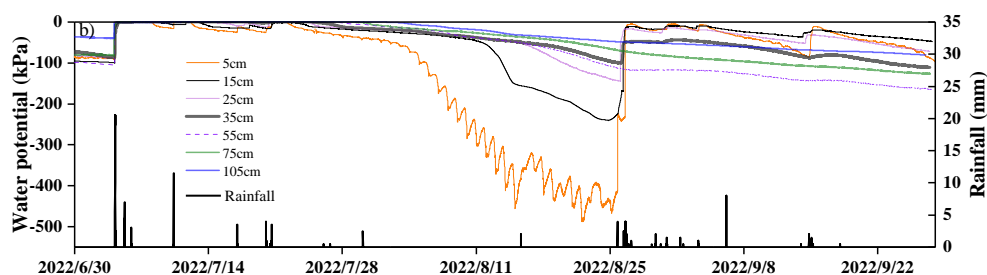

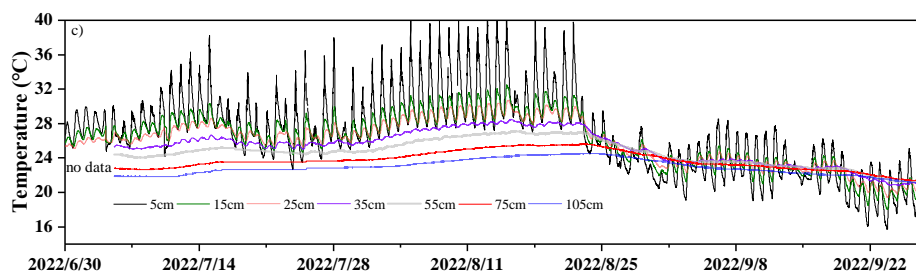

285  
286  
287

**Figure 3: Precipitation, water content, water potential, and soil temperature variation from June to October 2022 at the study site.**

288 During the flood season, the minimum and maximum soil temperatures in the soil layer above 105  
289 cm were 16°C and 42°C, respectively. Soil temperatures showed a significant decrease after the end of  
290 August. Spatially, soil temperature varied significantly near the surface, and the amplitude and range of  
291 variation decreased with depth. A similarly sinusoidal daily variation of soil temperature was also  
292 observed near the surface at 5, 15, 25, and 35 cm, with the highest temperature of the day being reached  
293 at around 12:00-14:00.

### 294 3.2 Soil Moisture changes response to precipitation

#### 295 3.2.1 Spatial variation of soil electrical resistivity

296 The resistivity changes are analyzed for the typical rain event that occurred on July 4, 2022. The mean  
297 SWC of 2 days before this rain event in the soil layer above 105 cm was  $0.31 \text{ cm}^3\text{cm}^{-3}$ . The mean inverted  
298 resistivity obtained for each ERT measurement in Figure 4a presents a decreasing trend during rainfall  
299 events, from  $25.8$  to  $22.0 \text{ } \Omega \text{ m}$ . The resistivity data were corrected based on temperature, so we can  
300 reasonably relate this decrease in resistivity to an increase in water content from rainfall infiltration  
301 (Travelletti et al., 2012; Greer et al., 2017), assuming no change in the subsurface geologic structure.  
302 Four ERT tomograms, shown in Table 2 and Figure 4b, were used to analyze the differential resistivity  
303 before, during, and after rainfall. The time-lapse ERT was taken from July 4, 17:35 (35 min after rainfall)  
304 to July 5, 08:00 (15 h after rainfall). At 35 min after rainfall (Figure 4b, Tomogram 1), the water content  
305 monitored by TDRs in pit 1 and pit 3 was  $0.35$  and  $0.39 \text{ cm}^3\text{cm}^{-3}$ , respectively. The lower resistivity at  
306 30 to 49.5 m and the higher resistivity at 0 to 29 m in the subsurface were detected, indicating the initial  
307 higher and lower water content, respectively.



308 **Table 2: Summary of ERT inversion before, during, and after rainfall.**

| ERT Survey time                    | No. of Total measurements | No. of rejected measurements | No. of iterations | RMS (%) |
|------------------------------------|---------------------------|------------------------------|-------------------|---------|
| Tomogram 1, 35 min after rainfall  | 1702                      | 71                           | 6                 | 4.71    |
| Tomogram 2, 140 min after rainfall | 1689                      | 250                          | 8                 | 4.29    |
| Tomogram 3, 210 min after rainfall | 1688                      | 283                          | 8                 | 4.16    |
| Tomogram 4, 15 h after rainfall    | 1700                      | 205                          | 4                 | 3.48    |

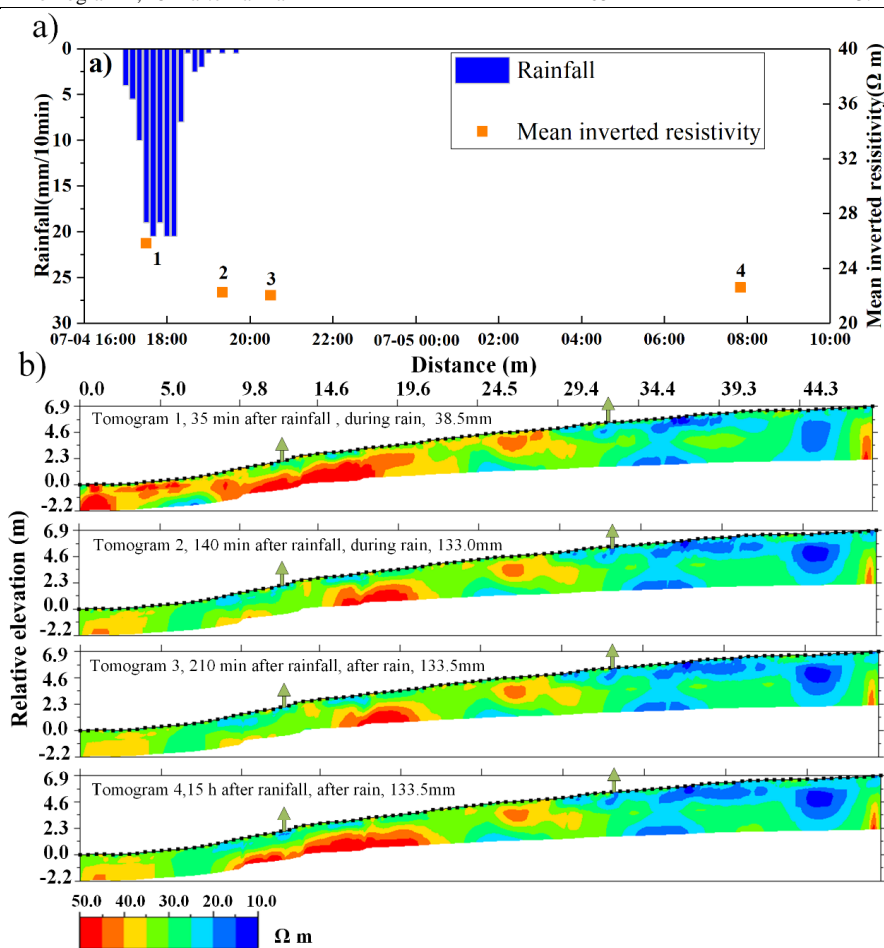

309  
 310 **Figure 4: ERT monitoring during the rainfall event, with a) Evolution of mean inverted resistivity during**  
 311 **ERT monitoring versus rain, b) the differenced resistivity model processed before, during, and after rainfall.**

312 Figure 5 shows that 140 minutes after rainfall, a total rainfall of 133.0 mm caused up to a maximum  
 313 76% decrease in resistivity at 0 to 20 m horizontally, 0 to 2.2 m depth (2.2 m is the depth of investigation,  
 314 and structures below this depth cannot be used for geological interpretation). Meanwhile, the water  
 315 content in each soil layer above 105 cm reached more than  $0.40 \text{ cm}^3\text{cm}^{-3}$ , with the average moisture

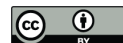

316 content in pit 1 and pit 3 being 0.42 and 0.43  $\text{cm}^3\text{cm}^{-3}$ , respectively. The significant decrease in resistivity  
317 was concentrated at the toe of the slope rather than the top, which may be attributed to rapid ponding of  
318 water caused along the slope. In addition, the site with lower initial water content and its silt loam texture  
319 would result in a more pronounced change rate of resistivity change. After 210 minutes, the rain almost  
320 stopped and the size of the subsurface accumulation area (blue) no longer increase significantly, but its  
321 degree of decreased resistivity and the increase in water content continually increased. At this moment,  
322 the average soil moisture in pit 1 and pit 3 were 0.43 and 0.44  $\text{cm}^3\text{cm}^{-3}$ , respectively, both increased by  
323 0.01  $\text{cm}^3\text{cm}^{-3}$  compared to the water content at 140 minutes after rainfall. As shown in Figure 5, the 10%  
324 change in resistivity between Tomograms 2 and 3 indicated that water preferentially reached deeper  
325 storage zones through the high permeability zones (blue). Meanwhile, the high permeability zones  
326 quickly became high resistivity areas (red) after the 15 hours (the average water content in pit 1 and pit  
327 3 were 0.41 and 0.42  $\text{cm}^3\text{cm}^{-3}$ , respectively). These separate preferential flow paths stimulated by high  
328 rainfall intensity, were likely the large voids such as the weathered or fractured rock that could easily  
329 move the wet peak during rainfall. Note that the resistivity increases (red or yellow) during precipitation  
330 in Figure 5, which is not an unreasonable response to the adding of water in the subsurface. This may be  
331 due to the inversion artifacts rather than a true increase in resistivity during the inversion process ( Greer  
332 et al., 2017).



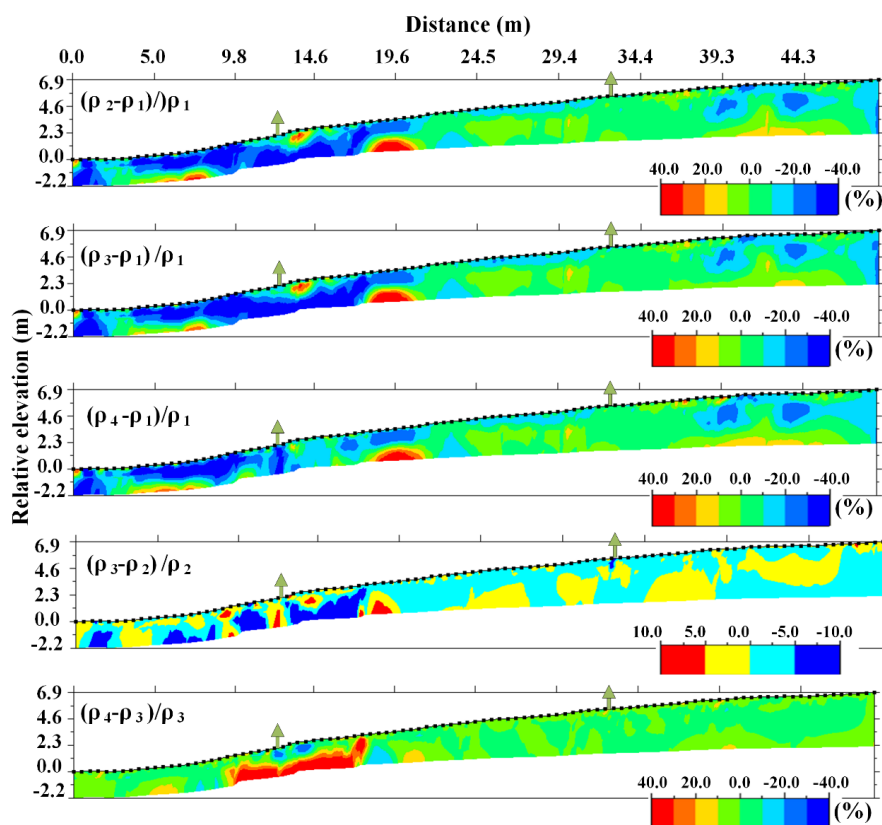

333  
 334 **Figure 5: Percentage change in resistivity from different initial model (The first three figures are the**  
 335 **percentage changes of resistivity with tomogram 1 as a background, and the next two figures are the**  
 336 **percentage changes of resistivity measured at adjacent times).**

337 **3.2.2 Quantitative comparison between Soil Moisture and Resistivity**

338 SWC variation is considered to be the most influential parameter for resistivity when the temperature  
 339 variation is compensated and other factors such as solid constituents remain stable (Clément et al., 2014).  
 340 Resistivity **always** links to water content through Archie’s law (Archie, 1942; Garré et al., 2011; Tsai et  
 341 al., 2021) which assumes the clay content is negligible. Whereas in the study area clay content is usually  
 342 greater than 10%. This condition cannot be considered satisfied. Referring to Travelletti et al. (2012) and  
 343 (Fan et al., 2015), we directly used a power-law fit in this paper. To map an observed subsurface  
 344 hydrological response, we developed site-specific resistivity and SWC ( $\rho$ - $\theta$ ) relationships by coupling  
 345 water content from **TDR probes at seven depths with ERT voxels at the corresponding positions**. Six  
 346 ERT surveys using Wenner and Dipole-Dipole respectively, along with TDR measurements, are



347 available for the same position of different pits and probe depths, which are pooled together as soil  
348 conditions were similar. Thus, we established relationships for two configurations (Wenner and Dipole-  
349 Dipole) during the flood season. As shown in Figure 6, the  $\rho$ - $\theta$  relationships are negatively correlated to  
350 a greater or lesser extent. Note that  $\rho$  and  $\theta$  varied between 18.8 and 49.7  $\Omega$  m, and 0.25 and 0.44  $\text{cm}^3\text{cm}^{-3}$ ,  
351 respectively. For the Dipole-Dipole ( $R^2 = 0.80$ ), the relationship appears much more concentrated than  
352 for the Wenner ( $R^2 = 0.70$ ). A better power fit was obtained using the Dipole-Dipole in this paper.

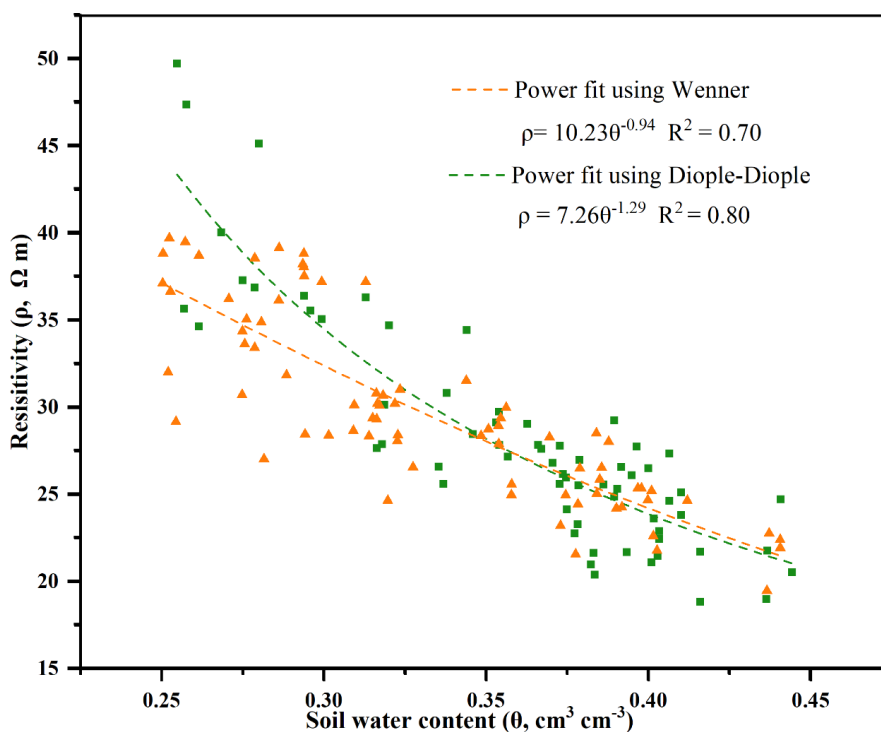

353  
354 **Figure 6: The  $\rho$ - $\theta$  relationship fitted with a power function with Dipole-Dipole or Wenner.**

### 355 3.2.3 2D images of soil moisture variation

356 The spatial variation of soil electrical resistivity cannot be used to directly provide quantitative estimates  
357 of the hydrological process. Therefore, based on the site-specific  $\rho$ - $\theta$  relationship proposed in the study  
358 area, 2-D images of SWC variation during the rainfall event were obtained. As shown in Figure 7, high  
359 SWC occurred at the top of the hillslope, and decreased rapidly down the slope. There are two preferential  
360 flow paths along the soil transect, as indicated by the red arrow. Combined with the seismic wave velocity  
361 results, the left preferential flow was connected through the soil-highly fractured bedrock interface,



362 which could be rapidly invaded by water. The right indicated the possible presence of a more permeable  
363 saprolite. In addition, the location of the *Quercus acutissima* Carruth site (the green arrow on the left)  
364 became wetter during the rainfall infiltration phase (during rainfall) and the rainfall distribution phase  
365 (after rainfall). In contrast, *Broussonetia papyrifera* site (the green arrow on the right) showed no visible  
366 change in wetness. This phenomenon may reflect the regulation of tree species and their root distribution  
367 characteristics for the movement of water flow. Unlike *Broussonetia papyrifera* with its shallow root  
368 system, *Quercus acutissima* Carruth with its deeper roots may take longer to receive the available water  
369 flow in the deeper soil layers and have a more pronounced effect on soil moisture changes.

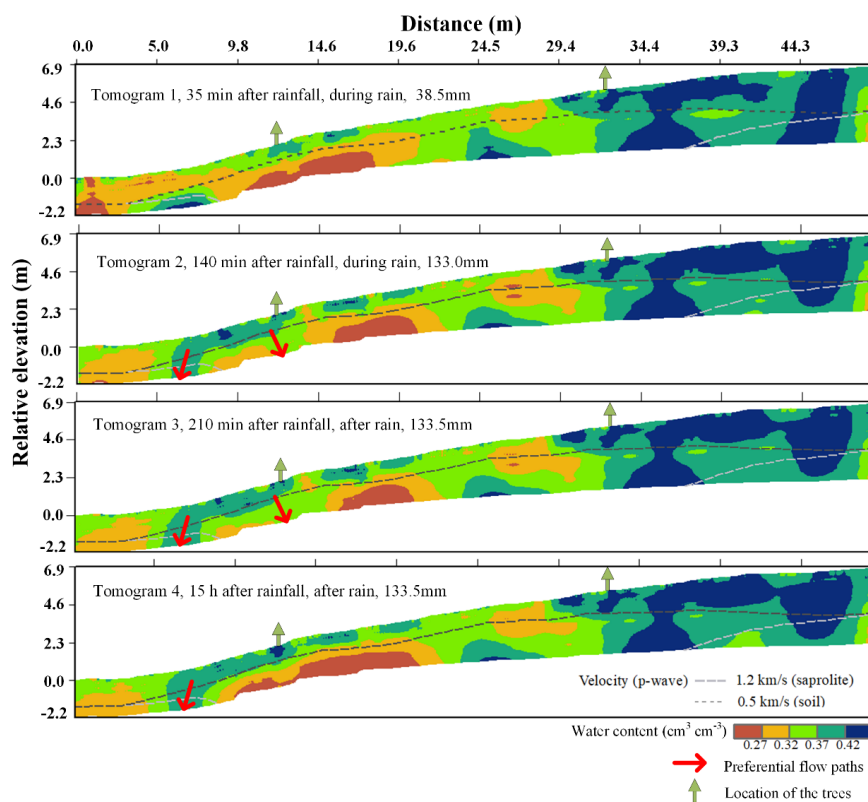

370  
371 **Figure 7: 2D images of SWC variation in the soil layer, estimated from the  $\rho-\theta$  relationship relationship. The**  
372 **green arrow on the left is the location of the *Quercus acutissima* Carruth and the right is the *Broussonetia***  
373 ***papyrifera*.**



### 374 3.3 Direction of water movement

375 Figure 8a shows the SP variability at depths corresponding to the rainfall. The typical rain event on July  
376 4, 2022 resulted in an increase and positive SP signal at different depths. The SP increase at 15, 25, 35  
377 and 55 cm depths occurred at 7, 17, 26, and 32 min after the rainfall. The response of SP near the surface  
378 soil layers is more rapid, and the response time is delayed with the increasing depth. In addition, as shown  
379 in Table 3, the rainfall caused an increase in the amplitude of the SP signal at a 15 cm depth with 7.5 mV,  
380 which is more significant than in the 25 cm soil layers with an increase of 5.0 mV. Meanwhile, the  
381 increase in SP amplitude at 35 cm depth was 11.4 mV, which is the maximum increase in SP amplitude  
382 at depth. Apparently, the increase in SP amplitude does not always increase with depth.

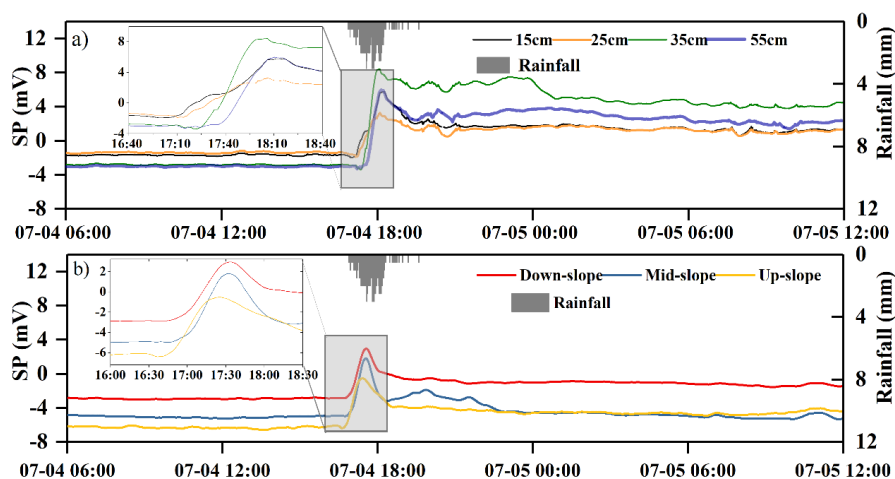

383  
384 **Figure 8: Response of the SP signal to rainfall a) in the vertical depths, and b) in the horizontal direction along**  
385 **the slope.**

386 To depict the lateral water movement, we divided the SP data into up-slope, mid-slope, and down-  
387 slope by averaging every six available data except for the first electrode (no data). As shown in Figure  
388 8b and Table 3, the SP signal on the up-slope, mid-slope, and down-slope started to show a response at  
389 3, 3, and 4 min after rainfall, respectively. This faster response time could be attributed to the fact that  
390 all SP monitoring electrodes on the slope were installed at a depth of 15 cm, where they are more  
391 susceptible to infiltration of rain. The rainfall-induced SP amplitude increase was also high, and the  
392 maximum increase reached 7.0 mV. We can also observe the apparent fluctuating variations of SP after  
393 the rainfall, which is most likely related to the disturbance of continuous rainfall distribution.



394 **Table 3: Variation of the SP due to the rainfall in the vertical depth and the horizontal position along the**  
 395 **slope.**

| Location        | SP electrode depth (cm) | Response time (min) | SP before rainfall (mV) | Max SP during rainfall (mV) | Rainfall-induced SP increase (mV) |
|-----------------|-------------------------|---------------------|-------------------------|-----------------------------|-----------------------------------|
| Vertical Depths | 15                      | 7                   | -1.7                    | 5.8                         | 7.5                               |
|                 | 25                      | 17                  | -1.7                    | 3.3                         | 5.0                               |
|                 | 35                      | 26                  | -3.0                    | 8.4                         | 11.4                              |
|                 | 55                      | 32                  | -2.9                    | 5.9                         | 8.8                               |
| Down-slope      | 15                      | 4                   | -2.7                    | 3.2                         | 5.9                               |
| Mid-slope       | 15                      | 3                   | -4.7                    | 2.3                         | 7.0                               |
| Up-slope        | 15                      | 3                   | -5.8                    | -0.6                        | 5.2                               |

396 Since the measured SP voltages should increase in the direction of water flow, this suggests that the  
 397 water flow down the slope or into deeper soil layers should result in an increase in SP. As shown in Table  
 398 3, the largest increase of SP in the down-slope location indicates the presence of lateral subsurface flow.  
 399 However, the magnitude changes between the slope locations are small. The difference between the  
 400 largest magnitude caused by rainfall in the mid-slope and the up-slope locations is only 1.8 mV (7.0 less  
 401 5.2). In the vertical depths, the water flows to the 35 cm depth where the SP is maximum. The difference  
 402 between the maximum SP of 25 cm and 35cm reached 6.4 mV (11.4 less 5.0), which is much larger than  
 403 the maximum amplitude change of 1.8 mV from the lateral flow on the slope. Therefore, we concluded  
 404 that the vertical infiltration flow plays a greater role than the lateral flow in the near-surface above 55 cm  
 405 at the Nandadish site.

406 We proposed a refined conceptual model to represent the water movement in the study area (Figure  
 407 9). Precipitation rapidly infiltrated into the surface soil layer, and the vertical infiltration was significant  
 408 in comparison to the lateral transmission flow. The water flow then continues to infiltrate along a more  
 409 permeable saprolite before entering the fissures in the fractured bedrock. The fractured bedrock layer  
 410 could be rapidly invaded by water, resulting in preferential infiltration along the lateral or vertical fissures.  
 411 Once the water encounters the bedrock, a limited lateral flow may occur above the bedrock surface, and  
 412 some water may infiltrate into the aquifer as deep drainage.

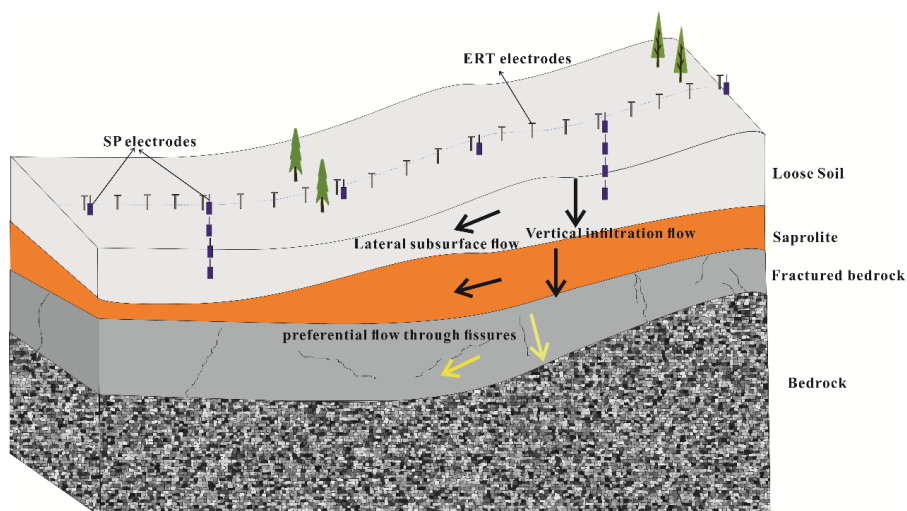

413

414 **Figure 9: The conceptual model to depict the water movement in the Nandadish site.**

#### 415 **4 Discussion**

##### 416 **4.1 Characterizing variation of subsurface flow using time-lapse ERT and SP**

417 The typical heavy rainfall in the study site resulted in a rapid water content response in the shallow soil  
418 in a short time, as confirmed by the TDRs (Figure 3). However, the hydrological monitoring could not  
419 provide further information to distinguish the infiltration pathways. Here, a combination of time-lapse  
420 ERT and SP was presented. ERT allowed us to observe the evolution of the wetting peak under transient  
421 unsaturated conditions with a sound spatial resolution, when rainfall occurred over a fixed rainfall  
422 simulator location (Carey et al., 2019). However, the natural rainfall often occurs over the entire slope,  
423 making it difficult to use ERT alone to determine whether the wetting evolution is dominated by lateral  
424 subsurface flow or vertical infiltration flow. Therefore, the SP data with a high temporal resolution of 1  
425 min interval can be used to explain the evaluation. The two-dimensional (horizontal and depth) SP results  
426 in Figure 8 show that the vertical flow rather than the lateral flow dominates, to drainage large amounts  
427 of rainwater into the subsoil in the Nandadish forecast catchment. Preferential flow paths are common in  
428 forest soils (Sidle et al., 2001; Dick et al., 2018). Two obvious vertical preferential flow paths in Figure  
429 7 were observed using ERT, providing important vertical hydrological connections between deep and  
430 shallow water during a rainfall event. The development of this combined approach provides the



431 opportunity for upward trends in moisture content and water flow direction, providing a earliest possible  
432 warning of runoff and landslide related to rainfall events, which could be extended to other regions.

433       Spatially, the resolution of the shallow (2.2 m) ERT inversion was improved by setting a smaller  
434 electrode distance (0.5 m). For temporal resolution, the data collection time with a frequency of 1 to 3  
435 hours (a single acquisition takes 45 min) is suitable for monitoring the development of infiltrating water  
436 in the unsaturated situation. However, it is necessary to seek improvements in more frequent and faster  
437 acquisition equipment that will help improve the temporal resolution in the future research. Besides,  
438 mapping subsurface flow at multiple rainfall intensities and types could provide complementary and  
439 valuable information to characterize and locate water movements in the Nandadish catchment. This is  
440 of great interest for the development of hydrological forecasting models.

#### 441 **4.2 Influence of different ERT configuration on the interpretation of resistivity**

442 The scatter (the larger  $R^2$  of 0.80 in the whole periods) of the  $\rho$ - $\theta$  relationships using Dipole-Dipole is  
443 slightly better than Wenner in Figure 6. The robust agreement between ERT and the SWC from TDR  
444 indicates that the usefulness of ERT for the spatial estimation of subsurface flow dynamics in the forest  
445 site. Based on this, six additional ERT results measured with the Dipole-Dipole were used to verify the  
446 reliability of the proposed  $\rho$ - $\theta$  relationships in Figure 6 by an evaluating  $R^2$  between the  $\theta$  from TDR ( $\theta$ -  
447 TDR) and  $\theta$  from ERT using the  $\rho$ - $\theta$  relationship ( $\theta$ -ERT). As presented in Figure 10, the verification  
448 results show that the  $R^2$  coefficient was 0.78. **These data demonstrate the robustness of the proposed  $\rho$ -  
449  $\theta$  relationship in practical applications, allowing interpretations of  $\rho$  in terms of hydrodynamic variations.**

450       From a quantitative point of view by using the  $R^2$  as a performance criterion, these results also  
451 suggest that in forested areas, the Dipole-Dipole may better help to obtain a more robust resistivity  
452 interpretation, when TDR was used to obtain the volumetric water content as an accurate reference. This  
453 may be attributed to the fact that the dipole-dipole array has better resolution for vertical structures such  
454 as the preferential flow induced by soil cracks (Zeng et al., 2016).

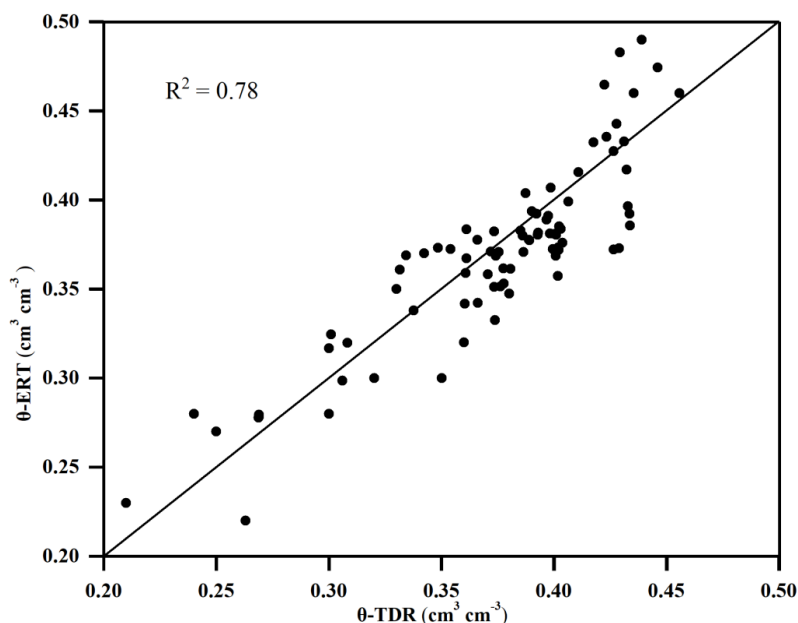

455

456

457

Figure 10: Comparison the SWC from ERT and the SWC from TDR to evaluate the robustness of the established  $\rho$ - $\theta$  relationship.

458

#### 4.3 Influence of root characteristics on the water infiltration

459

460

461

462

463

464

465

466

467

468

469

470

471

The infiltration process and soil moisture dynamics during a rainfall event as confirmed with higher heterogeneity in the resistivity and water content, were linked to the greater subsurface heterogeneity at the Nandadish catchment due to the distributed tree roots and shattered geological structure, both of which are known to be present at the forest site (Cassiani et al., 2015). At the tree root sites, the variation of water content at depth with typical rainfall processes were analyzed by converting the resistivity (Dipole-Dipole measurements) to water content distributions through the quantitative relationship established in this paper. Figure 11 shows an interesting phenomenon that tree species with different root structures can potentially lead to a differential distribution of water. The soil water content before the rainfall at the *Quercus acutissima* Carruth site was relatively small and drier than that of the *Broussonetia papyrifera* site, so the degree of change in water content due to rainfall was more pronounced, especially in the shallow surface layer. Generally, the amount of rainfall and the pre-soil condition together determine the degree of change of water content in the subsurface. At the site of *Broussonetia papyrifera*, the water content decreases with the depth, while at the site of *Quercus acutissima* Carruth, the trend is





472 exactly the opposite. The difference was more likely caused by the shallow roots of the *Broussonetia*  
473 *papyrifera*, which tended to retain more soil water at the surface. Instead, *Quercus acutissima* Carruth is  
474 expected to uptake and store water in the deeper depths. At the *Quercus acutissima* Carruth site, we found  
475 a significant and abrupt change in water content at the depth of 1.5 m. This may occur across boundaries  
476 of root and soil layers where root activity diverts new rainwater to replace the old and salty water. It is  
477 important to notice that deep and shallow root systems may also lead to an additional uncertainty in the  
478 estimation of the soil moisture content.

479 In this paper, we have made a two-dimensional explanation using the time-lapse ERT and SP, and  
480 found that the substructure and root distribution may directly affect the water content dynamics. Future  
481 studies will be directed toward a better understanding of how root characteristics affect the soil water  
482 content dynamics, by combining stem-centered 3-D surface and cross-hole ERT measurements with 3-  
483 D SP with short acquisition time.

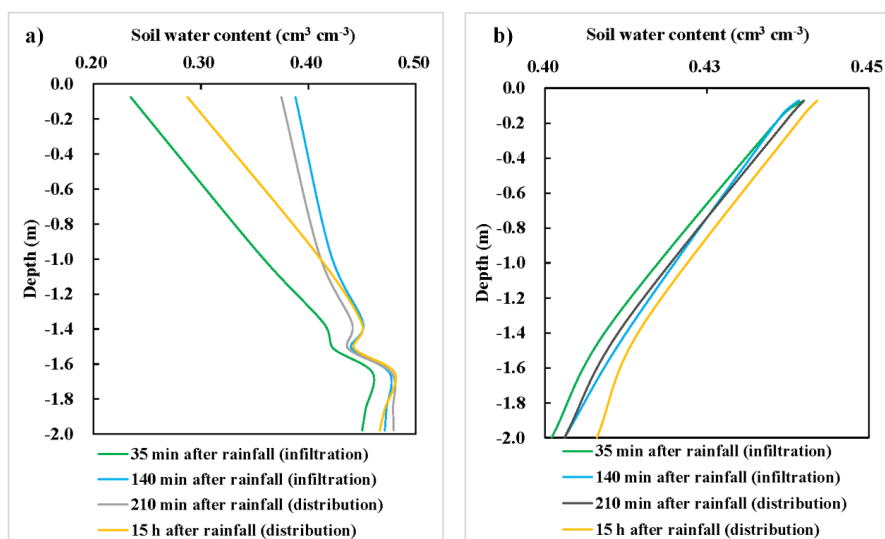

484  
485 **Figure 11: Depth profiles with tree locations from electrical resistivity tomography measurements during and**  
486 **after rainfall, with a) for the *Quercus acutissima* Carruth and b) for the *Broussonetia papyrifera*.**

## 487 5 Conclusions

488 This study contributes a conjunctive utility of time-lapse ERT and SP methods to realize the detailed  
489 spatial-temporal measurements of soil moisture dynamics and the water movement direction during

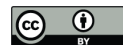

490 precipitation. This helps overcome the limitations of probe- or sample-based methods in terms of sample  
491 range or repeatability. Rather than simply describing the water status obtained by ERT, SP can assist in  
492 obtaining water flow information that has rarely been emphasized in previous studies. In addition, we  
493 developed site-specific  $\rho$ - $\theta$  relationships based on a variety of ERT measuring configurations and soil  
494 moisture conditions. This provided a more detailed description of the subsurface hydrologic response  
495 through quantitative comparison. Unlike the single configuration such as Wenner or Dipole-Dipole that  
496 is usually used, we used both configurations and compared them by the  $R^2$  of the  $\rho$ - $\theta$  relationship to  
497 obtain the most appropriate measurement configuration. Moreover, information on underground  
498 structures obtained from seismic refraction was combined with the water flow processes due to rainfall,  
499 to improve the understanding of the fluid movement in the subsurface. Although some artifacts are  
500 difficult to resolve, the combined utility of time-lapse ERT and SP methods proved effective in  
501 interpreting moisture content development and their direction. The presence of trees with different root  
502 characteristics and heterogeneous structures will affect the infiltration and distribution process of rainfall  
503 in the soil. Major conclusions are summarized below.

504 (1) It is effective to apply the combination of time-lapse ERT and SP for subsurface flow dynamics  
505 during the rainfall. The results provided by the SP clearly showed that the difference between the largest  
506 magnitude caused by rainfall along the slope is only 1.8 mV. In the vertical depths, the difference  
507 between the maximum SP reached 6.4 mV, which is much larger than the maximum amplitude change  
508 of 1.8 mV from the lateral flow on the slope. Therefore, the vertical flow rather than lateral flow  
509 dominates, to drain large amounts of rainwater into the subsurface in the Nandadish forecast catchment.  
510 Obvious vertical preferential flow paths were observed using ERT, providing important vertical  
511 hydrological connections between deep and shallow water during a rainfall event.

512 (2) Based on the established site-specific resistivity and SWC ( $\rho$ - $\theta$ ) relationships by coupling water  
513 content from TDR probes at depth with ERT voxels in the corresponding positions, we found that a better  
514 power fit was obtained using the Dipole-Dipole with  $R^2 = 0.80$  than the Wenner with  $R^2 = 0.70$ . The  
515 Dipole-Dipole configuration may help obtain more robust resistivity interpretations in the forested areas.

516 (3) The infiltration process and soil water moisture dynamics during a rainfall event, as confirmed  
517 by higher heterogeneity in the resistivity, were affected by the distributed tree roots and the fractured



518 geological structure. The preferential flow were connected through the soil-highly fractured bedrock  
519 interface or permeable saprolite, which could be rapidly invaded by water. Trees with shallow roots  
520 tended to retain a greater water content at the surface. **Deep-rooted trees absorb and store water in deeper**  
521 **layers, resulting in significant abrupt changes in the water content of the deeper soil layers.** The large  
522 permeability changes such as preferential flow due to the land cover and characteristics should be  
523 incorporated into physical hydrological models, which will be useful for the further refinement of the  
524 infiltration mechanism and simulation model development.

#### 525 **Data Availability**

526 Measured raw and inverted time-lapse ERT data are the property of the Chuzhou Scientific Hydrology  
527 Laboratory. These data are available from the corresponding author on request.

#### 528 **Authors Contribution**

529 Supervision for this research were acquired by Jiufu Liu and Guodong Liu. The methodology, study  
530 conception and experiments were designed and performed by Aimin Liao and Wenhang Jiang. The  
531 instrument, software, and data collection were provided by Jiufu Liu and and Aimin Liao. The  
532 interpretation of results were handled mainly by Wenhang Jiang. Wenhang Jiang written and prepared  
533 the original manuscript with contributions from all co-authors.

#### 534 **Competing Interest**

535 The authors declare that they have no conflict of interest.

#### 536 **Acknowledgements**

537 This study was supported by Nation Nature Science Foundation of China (Grant No. 91847301,  
538 92047203), the Science Foundation of Nanjing Hydraulic Research Institute (Y522017), and the Second  
539 Tibetan Plateau Scientific Expedition and Research (STEP) program (Grant No. 2019QZKK0203).



540 **References**

- 541 Advanced Geosciences, Inc. (AGI). Instruction Manual for EarthImager 2D Version 2.4.0 Resistivity  
542 and IP Inversion Software. Advanced Geosciences, Inc. Austin, TX, USA.
- 543 Ain-Lhout, F., Boutaleb, S., Diaz-Barradas, M. C., Jauregui, J., and Zunzunegui, M.: Monitoring the  
544 evolution of soil moisture in root zone system of *Argania spinosa* using electrical resistivity imaging,  
545 *Agric. Water Manag.*, 164, 158–166, <https://doi.org/10.1016/j.agwat.2015.08.007>, 2016.
- 546 Amato, M., Basso, B., Celano, G., Bitella, G., Morelli, G., and Rossi, R.: In situ detection of tree root  
547 distribution and biomass by multielectrode resistivity imaging, *Tree Physiol.*, 28, 1441–1448,  
548 <https://doi.org/10.1093/treephys/28.8.1441>, 2008.
- 549 Archie, G. E.: The Electrical Resistivity Log as an Aid in Determining Some Reservoir Characteristics,  
550 *Transactions of the AIME*, 146, 54–62, <https://doi.org/10.2118/942054-G>, 1942.
- 551 Beff, L., Günther, T., Vandoorne, B., Couvreur, V., and Javaux, M.: Three-dimensional monitoring of  
552 soil water content in a maize field using Electrical Resistivity Tomography, *Hydrol. Earth Syst. Sci.*, 17,  
553 595–609, <https://doi.org/10.5194/hess-17-595-2013>, 2013.
- 554 Carey, A. M., Paige, G. B., Carr, B. J., Holbrook, W. S., and Miller, S. N.: Characterizing hydrological  
555 processes in a semiarid rangeland watershed: A hydrogeophysical approach, *Hydrol. Process.*, 33, 759–  
556 774, <https://doi.org/10.1002/hyp.13361>, 2019.
- 557 Cassiani, G., Godio, A., Stocco, S., Villa, A., Deiana, R., Frattini, P., and Rossi, M.: Monitoring the  
558 hydrologic behaviour of a mountain slope via time-lapse electrical resistivity tomography, *Near Surf.*  
559 *Geophys.*, 7, 475–486, <https://doi.org/10.3997/1873-0604.2009013>, 2009.
- 560 Cassiani, G., Boaga, J., Vanella, D., Perri, M. T., and Consoli, S.: Monitoring and modelling of soil–  
561 plant interactions: the joint use of ERT, sap flow and eddy covariance data to characterize the volume of  
562 an orange tree root zone, *Hydrol. Earth Syst. Sci.*, 19, 2213–2225, [https://doi.org/10.5194/hess-19-2213-](https://doi.org/10.5194/hess-19-2213-2015)  
563 2015, 2015.
- 564 Clément, R., Moreau, S., Henine, H., Guérin, A., Chaumont, C., and Tournebize, J.: On the value of  
565 combining surface and cross-borehole ERT measurements to study artificial tile drainage processes, *Near*  
566 *Surf. Geophys.*, 12, 763–776, <https://doi.org/10.3997/1873-0604.2014034>, 2014.



- 567 Consoli, S., Stagno, F., Vanella, D., Boaga, J., Cassiani, G., and Rocuzzo, G.: Partial root-zone drying  
568 irrigation in orange orchards: Effects on water use and crop production characteristics, *Eur J Agron*, 82,  
569 190–202, <https://doi.org/10.1016/j.eja.2016.11.001>, 2017.
- 570 deGroot-Hedlin, C. and Constable, S.: Occam’s inversion to generate smooth, two-dimensional models  
571 from magnetotelluric data, *Geophysics*, 55, 1613–1624, <https://doi.org/10.1190/1.1442813>, 1990.
- 572 Dick, J., Tetzlaff, D., Bradford, J., and Soulsby, C.: Using repeat electrical resistivity surveys to assess  
573 heterogeneity in soil moisture dynamics under contrasting vegetation types, *J. Hydrol.*, 559, 684–697,  
574 <https://doi.org/10.1016/j.jhydrol.2018.02.062>, 2018.
- 575 Doussan, C., Jouniaux, L., and Thony, J.-L.: Variations of self-potential and unsaturated water flow with  
576 time in sandy loam and clay loam soils, *J. Hydrol.*, 267, 173–185, [https://doi.org/10.1016/S0022-](https://doi.org/10.1016/S0022-1694(02)00148-8)  
577 1694(02)00148-8, 2002.
- 578 Fan, B., Liu, X., Zhu, Q., Qin, G., Li, J., Lin, H., and Guo, L.: Exploring the interplay between infiltration  
579 dynamics and Critical Zone structures with multiscale geophysical imaging: A review, *Geoderma*, 374,  
580 114431, <https://doi.org/10.1016/j.geoderma.2020.114431>, 2020.
- 581 Fan, J., Scheuermann, A., Guyot, A., Baumgartl, T., and Lockington, D. A.: Quantifying spatiotemporal  
582 dynamics of root-zone soil water in a mixed forest on subtropical coastal sand dune using surface ERT  
583 and spatial TDR, *J. Hydrol.*, 523, 475–488, <https://doi.org/10.1016/j.jhydrol.2015.01.064>, 2015.
- 584 Garré, S., Javaux, M., Vanderborght, J., Pagès, L., and Vereecken, H.: Three-Dimensional Electrical  
585 Resistivity Tomography to Monitor Root Zone Water Dynamics, *Vadose Zone J*, 10, 412–424,  
586 <https://doi.org/10.2136/vzj2010.0079>, 2011.
- 587 Giudici, M.: Fast representation of dipole-dipole geoelectrical data with pseudosections for regional  
588 surveys, *Annals of Geophysics*, 43(2). <http://hdl.handle.net/2122/1263>
- 589 Greer, B. M., Burbey, T. J., Zipper, C. E., and Hester, E. T.: Electrical resistivity imaging of hydrologic  
590 flow through surface coal mine valley fills with comparison to other landforms, *Hydrol. Process.*, 31,  
591 2244–2260, <https://doi.org/10.1002/hyp.11180>, 2017.
- 592 Gu, W.-Z., Liu, J.-F., Lin, H., Lin, J., Liu, H.-W., Liao, A.-M., Wang, N., Wang, W.-Z., Ma, T., Yang,  
593 N., Li, X.-G., Zhuo, P., and Cai, Z.: Why Hydrological Maze: The Hydropedological Trigger? Review



594 of Experiments at Chuzhou Hydrology Laboratory, *Vadose Zone J*, 17, 1–27,  
595 <https://doi.org/10.2136/vzj2017.09.0174>, 2018.

596 Guo, L., Mount, G. J., Hudson, S., Lin, H., and Levia, D.: Pairing geophysical techniques improves  
597 understanding of the near-surface Critical Zone: Visualization of preferential routing of stemflow along  
598 coarse roots, *Geoderma*, 357, 113953, <https://doi.org/10.1016/j.geoderma.2019.113953>, 2020.

599 Hermans, T., Goderniaux, P., Jougnot, D., Fleckenstein, J. H., Brunner, P., Nguyen, F., Linde, N.,  
600 Huisman, J. A., Bour, O., Lopez Alvis, J., Hoffmann, R., Palacios, A., Cooke, A.-K., Pardo-Álvarez, Á.,  
601 Blazevic, L., Pouladi, B., Haruzi, P., Fernandez Visentini, A., Nogueira, G. E. H., Tirado-Conde, J.,  
602 Looms, M. C., Kenschlikova, M., Davy, P., and Le Borgne, T.: Advancing measurements and  
603 representations of subsurface heterogeneity and dynamic processes: towards 4D hydrogeology, *Hydrol.*  
604 *Earth Syst. Sci.*, 27, 255–287, <https://doi.org/10.5194/hess-27-255-2023>, 2023.

605 Hojat, A., Arosio, D., Ivanov, V. I., Longoni, L., Papini, M., Scaioni, M., Tresoldi, G., and Zanzi, L.:  
606 Geoelectrical characterization and monitoring of slopes on a rainfall-triggered landslide simulator, *J Appl*  
607 *Geophys*, 170, 103844, <https://doi.org/10.1016/j.jappgeo.2019.103844>, 2019.

608 Holbrook, W. S., Riebe, C. S., Elwaseif, M., L. Hayes, J., Basler-Reeder, K., L. Harry, D., Malazian, A.,  
609 Dosseto, A., C. Hartsough, P., and W. Hopmans, J.: Geophysical constraints on deep weathering and  
610 water storage potential in the Southern Sierra Critical Zone Observatory, *Earth Surf. Process. Landforms*,  
611 39, 366–380, <https://doi.org/10.1002/esp.3502>, 2014.

612 Linde, N., Doetsch, J., Jougnot, D., Genoni, O., Dürst, Y., Minsley, B. J., Vogt, T., Pasquale, N., and  
613 Luster, J.: Self-potential investigations of a gravel bar in a restored river corridor, *Hydrol. Earth Syst.*  
614 *Sci.*, 15, 729–742, <https://doi.org/10.5194/hess-15-729-2011>, 2011.

615 Luongo, R., Perrone, A., Piscitelli, S., and Lapenna, V.: A Prototype System for Time-Lapse Electrical  
616 Resistivity Tomographies, *International Journal of Geophysics*, 2012, 1–12,  
617 <https://doi.org/10.1155/2012/176895>, 2012.

618 Nielson, T., Bradford, J., Pierce, J., and Seyfried, M.: Soil structure and soil moisture dynamics inferred  
619 from time-lapse electrical resistivity tomography, *Catena*, 207, 105553,  
620 <https://doi.org/10.1016/j.catena.2021.105553>, 2021.

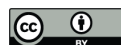

- 621 Nimmer, R. E., Osiensky, J. L., Binley, A. M., Sprenke, K. F., and Williams, B. C.: Electrical resistivity  
622 imaging of conductive plume dilution in fractured rock, *Hydrogeol J*, 15, 877–890,  
623 <https://doi.org/10.1007/s10040-007-0159-z>, 2007.
- 624 Oldenburg, D. W. and Li, Y.: Estimating depth of investigation in dc resistivity and IP surveys,  
625 *Geophysics*, 64, 403–416, <https://doi.org/10.1190/1.1444545>, 1999.
- 626 Parsekian, A. D., Singha, K., Minsley, B. J., Holbrook, W. S., and Slater, L.: Multiscale geophysical  
627 imaging of the critical zone: Geophysical Imaging of the Critical Zone, *Rev. Geophys.*, 53, 1–26,  
628 <https://doi.org/10.1002/2014RG000465>, 2015.
- 629 Revil, A., Karaoulis, M., Johnson, T., and Kemna, A.: Review: Some low-frequency electrical methods  
630 for subsurface characterization and monitoring in hydrogeology, *Hydrogeol J*, 20, 617–658,  
631 <https://doi.org/10.1007/s10040-011-0819-x>, 2012.
- 632 Richards, K., Revil, A., Jardani, A., Henderson, F., Batzle, M., and Haas, A.: Pattern of shallow ground  
633 water flow at Mount Princeton Hot Springs, Colorado, using geoelectrical methods, *J. Volcanol.*  
634 *Geotherm. Res.*, 198, 217–232, <https://doi.org/10.1016/j.jvolgeores.2010.09.001>, 2010.
- 635 Robinson, J. L., Slater, L. D., and Schäfer, K. V. R.: Evidence for spatial variability in hydraulic  
636 redistribution within an oak–pine forest from resistivity imaging, *J. Hydrol.*, 430–431, 69–79,  
637 <https://doi.org/10.1016/j.jhydrol.2012.02.002>, 2012.
- 638 Sidle, R. C., Noguchi, S., Tsuboyama, Y., and Laursen, K.: A conceptual model of preferential flow  
639 systems in forested hillslopes: evidence of self-organization, *Hydrol. Process.*, 15, 1675–1692,  
640 <https://doi.org/10.1002/hyp.233>, 2001.
- 641 Srayeddin, I. and Doussan, C.: Estimation of the spatial variability of root water uptake of maize and  
642 sorghum at the field scale by electrical resistivity tomography, *Plant Soil*, 319, 185–207,  
643 <https://doi.org/10.1007/s11104-008-9860-5>, 2009.
- 644 Suski, B., Revil, A., Titov, K., Konosavsky, P., Voltz, M., Dagès, C., and Huttel, O.: Monitoring of an  
645 infiltration experiment using the self-potential method, *Water Resour. Res.*, 42,  
646 <https://doi.org/10.1029/2005WR004840>, 2006.



- 647 Tetzlaff, D., Birkel, C., Dick, J., Geris, J., and Soulsby, C.: Storage dynamics in hypedopedological units  
648 control hillslope connectivity, runoff generation, and the evolution of catchment transit time distributions,  
649 *Water Resour. Res.*, 50, 969–985, <https://doi.org/10.1002/2013WR014147>, 2014.
- 650 Travelletti, J., Sailhac, P., Malet, J.-P., Grandjean, G., and Ponton, J.: Hydrological response of  
651 weathered clay-shale slopes: water infiltration monitoring with time-lapse electrical resistivity  
652 tomography, *Hydrol. Process.*, 26, 2106–2119, <https://doi.org/10.1002/hyp.7983>, 2012.
- 653 Tsai, W.-N., Chen, C.-C., Chiang, C.-W., Chen, P.-Y., Kuo, C.-Y., Wang, K.-L., Lin, M.-L., and Chen,  
654 R.-F.: Electrical Resistivity Tomography (ERT) Monitoring for Landslides: Case Study in the Lantai  
655 Area, Yilan Taiping Mountain, Northeast Taiwan, *Front. Earth Sci.*, 9, 737271,  
656 <https://doi.org/10.3389/feart.2021.737271>, 2021.
- 657 Vanella, D., Cassiani, G., Busato, L., Boaga, J., Barbagallo, S., Binley, A., and Consoli, S.: Use of small  
658 scale electrical resistivity tomography to identify soil-root interactions during deficit irrigation, *J. Hydrol.*,  
659 556, 310–324, <https://doi.org/10.1016/j.jhydrol.2017.11.025>, 2018.
- 660 Voytek, E. B., Rushlow, C. R., Godsey, S. E., and Singha, K.: Identifying hydrologic flowpaths on arctic  
661 hillslopes using electrical resistivity and self potential, *Geophysics*, 81, WA225–WA232,  
662 <https://doi.org/10.1190/geo2015-0172.1>, 2016.
- 663 Voytek, E. B., Barnard, H. R., Jougnot, D., and Singha, K.: Transpiration- and precipitation-induced  
664 subsurface water flow observed using the self-potential method, *Hydrol. Process.*, hyp.13453,  
665 <https://doi.org/10.1002/hyp.13453>, 2019.
- 666 Wang, H., Fu, S.J., Ge, S.Y., Ma, F.Y., Song, B.Y., and Luo, J.C.: Development and performance testing  
667 of maintenance free ultra-low noise solid unpolarized electrodes. *Geophysical and Geochemical*  
668 *Exploration*, 46 (3): 714-721, <https://doi.org/10.11720/wtyht.2022.1386>, 2022.
- 669 Zeng, R. Q., Meng, X. M., Zhang, F. Y., Wang, S. Y., Cui, Z. J., Zhang, M. S., Zhang, Y., and Chen, G.:  
670 Characterizing hydrological processes on loess slopes using electrical resistivity tomography – A case  
671 study of the Heifangtai Terrace, Northwest China, *J. Hydrol.*, 541, 742–753,  
672 <https://doi.org/10.1016/j.jhydrol.2016.07.033>, 2016.





673 Zhou, Q. Y., Shimada, J., and Sato, A.: Three-dimensional spatial and temporal monitoring of soil water  
674 content using electrical resistivity tomography, *Water Resour. Res.*, 37, 273–285,  
675 <https://doi.org/10.1029/2000WR900284>, 2001.  
676
